# Supplementary material for: Putative regulation mechanism for the MSTN gene by a CpG island generated by the SINE marker Ins227bp
Source: PubMed Central journal article supplement (PMC4476204; doi:10.1186/s12917-015-0428-3), 2015-06-23
Supplement: 12917_2015_428_MOESM1_ESM.pdf [file 12917_2015_428_MOESM1_ESM.pdf]

## Linkage Disequilibrium

### Haploview 4.2

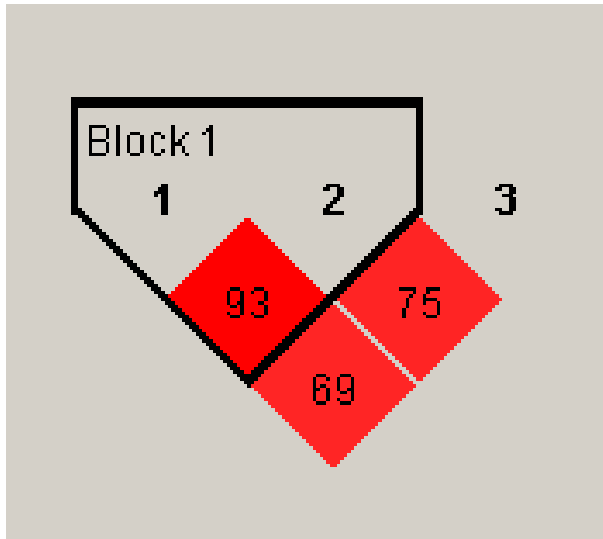

### LD Plot

1: Speedgene polymorphism (intron 1 of *MSTN*)

2: INS227bp

3: BIEC2 (BIEC2-417495)

Haploview 4.2

29 April, 2008

<http://www.broadinstitute.org/haploview/haploview>

Citation: Barrett JC, Fry B, Maller J, Daly MJ.

Haploview: analysis and visualization of LD and haplotype maps. *Bioinformatics*. 2005

Daly Lab at the Broad Institute  
Cambridge, MA 02141, USA

Jeffrey Barrett

Julian B. Maller

David J. Bender

Jesse C. Whitworth

[haploview@broad.mit.edu](mailto:haploview@broad.mit.edu)

Haploview can be cited with the following [paper](#):

*Barrett JC, Fry B, Maller J, Daly MJ. Haploview: analysis and visualization of LD and haplotype maps. Bioinformatics. 2005 Jan 15 [PubMed ID: 15297300]*

Citations: 7340 (January 2015)

LD in the Hill article, BMC Genomics, 2010:

- LD was highest between g.66493737C>T and BIEC2-417495 ( $r^2 = 0.86$ ).
- LD between g.66493737C>T and Ins227bp was  $r^2 = 0.73$

### SHESis (<http://analysis.bio-x.cn/myAnalysis.php>)

|           |          |       |
|-----------|----------|-------|
| $r^2$ :   | INS227bp | BIEC2 |
| speedgene | 0.931    | 0.699 |
| INS227bp  | -        | 0.758 |

|           |          |       |
|-----------|----------|-------|
| $D'$ :    | INS227bp | BIEC2 |
| speedgene | 1.000    | 0.915 |
| INS227bp  | -        | 0.919 |

Cite "Shi YY, He L. SHESis, a powerful software platform for analyses of linkage disequilibrium, haplotype construction, and genetic association at polymorphism loci. *Cell Res*. 2005 Feb;15(2):97-8." if you used this platform for research study.

Citations: 774 (January 2015)
