# Supplementary material for: Putative regulation mechanism for the MSTN gene by a CpG island generated by the SINE marker Ins227bp
Source: PubMed Central journal article supplement (PMC4476204; doi:10.1186/s12917-015-0428-3), 2015-06-23
Supplement: 12917_2015_428_MOESM2_ESM.pdf [file 12917_2015_428_MOESM2_ESM.pdf]

## Supplemental information

**Table S1** Details of genotyping assays

| Polymorphism<br>(Reference)                                      | Position on chromo-some 18   | Assay type            |
|------------------------------------------------------------------|------------------------------|-----------------------|
| Ins227bp<br>(Hill et al. 2010)                                   | 66495327 [Ins227bp] 66495326 | qPCR                  |
| g.66493737C/T<br>(GenBank:<br>AY840554.2)                        | 66493737                     | Dye-based ARMS-qPCR   |
| BIEC2-417495<br>(Binns et al. 2010; Hill<br>et al. 2010), BLAT)c | 67186093                     | Probe-based ARMS-qPCR |

Tabel S1 (cont)

| Polymorphism      | Sequence of oligonucleotide (5' to 3')          | T <sub>m</sub> (°C) <sup>a</sup> | Length (bp) | Amplicon length (bp) | Amplicon T <sub>m</sub> (°C) <sup>b</sup> |
|-------------------|-------------------------------------------------|----------------------------------|-------------|----------------------|-------------------------------------------|
| Ins227bp          | F: TGACAGCGAGATTCATTGTGG                        | 58.3                             | 21          | 174 and              | 77.8 and                                  |
|                   | R: CTTTTGAGCAATGCCAAGCA                         | 58.6                             | 20          | 401                  | 83.9                                      |
| g.66493737C/<br>T | F: CTTTATCTACTTTAAACAGGACACAACA                 | 55.6                             | 28          | 78                   | 76.4 to 77.3                              |
|                   | R(T): TGATAGCAGAGTCATAAAGGAAAATgA <u>I</u>      | 58.8                             | 28          |                      |                                           |
|                   | R(C): TGATAGCAGAGTCATAAAGGAAAATaA <u>C</u>      | 56.7                             | 28          |                      |                                           |
| BIEC2-<br>417495  | F(C): AATACCTTGATTGATTGGTTTTAcA <u>C</u>        | 55.7                             | 26          | 160                  | not applicable                            |
|                   | F(T): AATACCTTGATTGATTGGTTTTAcA <u>I</u>        | 55.4                             | 26          |                      |                                           |
|                   | R: AGATGATGGTTAGACTTTGTGTCTGAT                  | 57.5                             | 27          |                      |                                           |
|                   | Probe: FAM-<br>CCTTCTTCAATCTCTGTTCCCTGGCCT-BHQ1 | 67.3                             | 27          |                      |                                           |

Underlined and small letters in the sequence of a SNP-specific primer designate the targeted nucleotide and the artificial mismatch introduced to increase specificity, respectively.

F(C), F(T), R(C), R(T): forward or reverse primer specific for C or T allele, respectively

T<sub>m</sub>: melting temperature

<sup>a</sup>predicted by Primer Express 2.0 software (Life Technologies); in case of SNP-specific primers, T<sub>m</sub> was predicted for the completely matching sequence

<sup>b</sup>determined by dissociating products of fluorogenic dye-based qPCR

<sup>c</sup>amplicon spans positions 67,186,068 to 67,186,227 in the alignment tool BLAT (BLAST-Ilike Alignment Tool)
